# Supplementary material for: Positive Selection and Centrality in the Yeast and Fly Protein-Protein Interaction Networks
Source: Hindawi journal article supplement (doi:10.1155/2016/4658506), 2016-01-01
Supplement: f1 [file 4658506.f1.pdf]

SUPPLEMENTARY MATERIAL

## **Positive selection and centrality in the yeast and fly protein–protein interaction networks**

Sandip Chakraborty and David Alvarez-Ponce

Department of Biology, University of Nevada, Reno, Nevada 89557, US.

**Table S1. Summary statistics of the networks used in the study**

| Organism               | Database                  | Number of proteins | Number of interactions |
|------------------------|---------------------------|--------------------|------------------------|
| <i>S. cerevisiae</i>   | BioGRID                   | 5864               | 81,040                 |
|                        | STRING (score $\geq$ 40%) | 6303               | 332,039                |
| <i>D. melanogaster</i> | BioGRID                   | 7968               | 36,589                 |
|                        | STRING (score $\geq$ 40%) | 12,223             | 454,083                |

**Table S2. Network centralities of positively selected genes ( $P < 0.05$ ) and genes with no signatures of positive selection in *S. cerevisiae***

|             |        | BioGRID                        |                               |            | STRING                         |                               |            |
|-------------|--------|--------------------------------|-------------------------------|------------|--------------------------------|-------------------------------|------------|
|             |        | Selected genes<br>( $n = 89$ ) | Other genes<br>( $n = 1956$ ) | $P$ -value | Selected genes<br>( $n = 91$ ) | Other genes<br>( $n = 1976$ ) | $P$ -value |
| Degree      | Mean   | 18.01                          | 27.23                         | 0.016*     | 90.76                          | 113.04                        | 0.039*     |
|             | Median | 13                             | 14                            |            | 68                             | 78                            |            |
| Betweenness | Mean   | $6.73 \times 10^{-5}$          | $1.90 \times 10^{-4}$         | 0.636      | $1.02 \times 10^{-4}$          | $1.74 \times 10^{-4}$         | 0.229      |
|             | Median | $1.21 \times 10^{-5}$          | $2.34 \times 10^{-5}$         |            | $6.36 \times 10^{-5}$          | $7.40 \times 10^{-5}$         |            |
| Closeness   | Mean   | 0.3869                         | 0.3995                        | 0.008**    | 0.4342                         | 0.4449                        | 0.014*     |
|             | Median | 0.3943                         | 0.4045                        |            | 0.4485                         | 0.4518                        |            |

$P$ -values correspond to the Mann–Whitney  $U$  test. \*,  $P < 0.05$ ; \*\*,  $P < 0.01$ .

**Table S3. Network centralities of positively selected genes ( $P < 0.01$ ) and genes with no signatures of positive selection in *S. cerevisiae***

|             |        | BioGRID                        |                               |            | STRING                         |                               |            |
|-------------|--------|--------------------------------|-------------------------------|------------|--------------------------------|-------------------------------|------------|
|             |        | Selected genes<br>( $n = 31$ ) | Other genes<br>( $n = 2014$ ) | $P$ -value | Selected genes<br>( $n = 33$ ) | Other genes<br>( $n = 2034$ ) | $P$ -value |
| Degree      | Mean   | 20.45                          | 26.93                         | 0.810      | 102.73                         | 112.21                        | 0.792      |
|             | Median | 15                             | 14                            |            | 76                             | 77                            |            |
| Betweenness | Mean   | $8.6 \times 10^{-5}$           | $1.9 \times 10^{-4}$          | 0.540      | $1.2 \times 10^{-4}$           | $1.7 \times 10^{-4}$          | 0.475      |
|             | Median | $1.7 \times 10^{-5}$           | $2.3 \times 10^{-5}$          |            | $6.3 \times 10^{-5}$           | $7.3 \times 10^{-5}$          |            |
| Closeness   | Mean   | 0.4066                         | 0.3989                        | 0.350      | 0.4451                         | 0.4444                        | 0.718      |
|             | Median | 0.4115                         | 0.4037                        |            | 0.4531                         | 0.4515                        |            |

$P$ -values correspond to the Mann–Whitney  $U$  test.

**Table S4. Network centralities of positively selected genes ( $q < 0.1$ ) and genes with no signatures of positive selection in *S. cerevisiae***

|             |        | BioGRID                       |                               |            | STRING                        |                               |            |
|-------------|--------|-------------------------------|-------------------------------|------------|-------------------------------|-------------------------------|------------|
|             |        | Selected genes<br>( $n = 5$ ) | Other genes<br>( $n = 2040$ ) | $P$ -value | Selected genes<br>( $n = 5$ ) | Other genes<br>( $n = 2062$ ) | $P$ -value |
| Degree      | Mean   | 15.60                         | 26.86                         | 0.516      | 71.40                         | 112.16                        | 0.608      |
|             | Median | 9                             | 14                            |            | 76                            | 77                            |            |
| Betweenness | Mean   | $3.8 \times 10^{-5}$          | $1.90 \times 10^{-4}$         | 0.764      | $2.1 \times 10^{-4}$          | $1.7 \times 10^{-4}$          | 0.782      |
|             | Median | $1.0 \times 10^{-5}$          | $2.29 \times 10^{-5}$         |            | $1.1 \times 10^{-4}$          | $7.3 \times 10^{-5}$          |            |
| Closeness   | Mean   | 0.4141                        | 0.3990                        | 0.369      | 0.4474                        | 0.4444                        | 0.818      |
|             | Median | 0.4190                        | 0.4037                        |            | 0.4497                        | 0.4516                        |            |

$P$ -values correspond to the Mann–Whitney  $U$  test.

**Table S5. Network centralities of positively selected genes ( $P < 0.05$ ) and genes with no signatures of positive selection in *D. melanogaster***

|             |        | BioGRID                         |                               |            | STRING                          |                               |            |
|-------------|--------|---------------------------------|-------------------------------|------------|---------------------------------|-------------------------------|------------|
|             |        | Selected genes<br>( $n = 350$ ) | Other genes<br>( $n = 6171$ ) | $P$ -value | Selected genes<br>( $n = 247$ ) | Other genes<br>( $n = 4167$ ) | $P$ -value |
| Degree      | Mean   | 10.49                           | 9.19                          | 0.049*     | 71.23                           | 61.17                         | 0.0004***  |
|             | Median | 4                               | 4                             |            | 35                              | 23                            |            |
| Betweenness | Mean   | $4.5 \times 10^{-4}$            | $3.8 \times 10^{-4}$          | 0.008**    | $1.3 \times 10^{-4}$            | $1.1 \times 10^{-4}$          | 0.242      |
|             | Median | $5.0 \times 10^{-5}$            | $3.0 \times 10^{-5}$          |            | $4.0 \times 10^{-5}$            | $2.0 \times 10^{-5}$          |            |
| Closeness   | Mean   | 0.2418                          | 0.2387                        | 0.045*     | 0.3280                          | 0.3214                        | 0.0075**   |
|             | Median | 0.2439                          | 0.2406                        |            | 0.3312                          | 0.3243                        |            |

$P$ -values correspond to the Mann–Whitney  $U$  test. \*,  $P < 0.05$ ; \*\*,  $P < 0.01$ ; \*\*\*,  $P < 0.001$ .

**Table S6. Network centralities of positively selected genes ( $P < 0.01$ ) and genes with no signatures of positive selection in *D. melanogaster***

|             |        | BioGRID                         |                               |            | STRING                         |                               |                         |
|-------------|--------|---------------------------------|-------------------------------|------------|--------------------------------|-------------------------------|-------------------------|
|             |        | Selected genes<br>( $n = 139$ ) | Other genes<br>( $n = 6373$ ) | $P$ -value | Selected genes<br>( $n = 95$ ) | Other genes<br>( $n = 4310$ ) | $P$ -value              |
| Degree      | Mean   | 11.27                           | 9.21                          | 0.018*     | 80.57                          | 61.32                         | $2.7 \times 10^{-5}***$ |
|             | Median | 5                               | 4                             |            | 51                             | 23                            |                         |
| Betweenness | Mean   | $5.1 \times 10^{-4}$            | $3.8 \times 10^{-4}$          | 0.053      | $1.7 \times 10^{-4}$           | $1.0 \times 10^{-4}$          | 0.022*                  |
|             | Median | $6.2 \times 10^{-5}$            | $3.2 \times 10^{-5}$          |            | $6.2 \times 10^{-5}$           | $2.0 \times 10^{-5}$          |                         |
| Closeness   | Mean   | 0.2456                          | 0.2387                        | 0.006**    | 0.3304                         | 0.3215                        | 0.006**                 |
|             | Median | 0.2473                          | 0.2406                        |            | 0.3359                         | 0.3243                        |                         |

$P$ -values correspond to the Mann–Whitney  $U$  test. \*,  $P < 0.05$ ; \*\*,  $P < 0.01$ ; \*\*\*,  $P < 0.001$ .

**Table S7. Network centralities of positively selected genes ( $q < 0.1$ ) and genes with no signatures of positive selection in *D. melanogaster***

|             |        | BioGRID                        |                               |            | STRING                         |                               |                         |
|-------------|--------|--------------------------------|-------------------------------|------------|--------------------------------|-------------------------------|-------------------------|
|             |        | Selected genes<br>( $n = 50$ ) | Other genes<br>( $n = 6462$ ) | $P$ -value | Selected genes<br>( $n = 33$ ) | Other genes<br>( $n = 4167$ ) | $P$ -value              |
| Degree      | Mean   | 10.16                          | 9.25                          | 0.542      | 102.15                         | 61.42                         | $4.2 \times 10^{-4}***$ |
|             | Median | 4                              | 4                             |            | 72                             | 23                            |                         |
| Betweenness | Mean   | $4.3 \times 10^{-4}$           | $3.9 \times 10^{-4}$          | 0.717      | $2.5 \times 10^{-4}$           | $1.1 \times 10^{-4}$          | 0.002**                 |
|             | Median | $3.1 \times 10^{-5}$           | $3.2 \times 10^{-5}$          |            | $9.4 \times 10^{-5}$           | $2.1 \times 10^{-5}$          |                         |
| Closeness   | Mean   | 0.24612                        | 0.23883                       | 0.154      | 0.33877                        | 0.32160                       | 0.009**                 |
|             | Median | 0.24267                        | 0.24070                       |            | 0.34371                        | 0.32445                       |                         |

$P$ -values correspond to the Mann–Whitney  $U$  test. \*,  $P < 0.05$ ; \*\*,  $P < 0.01$ ; \*\*\*,  $P < 0.001$ .
